# Supplementary material for: Isolation and Structural Determination of Two Novel Phlorotannins from the Brown Alga Ecklonia kurome Okamura, and Their Radical Scavenging Activities
Source: MDPI journal article supplement (doi:10.3390/md11010165), 2013-01-18
Supplement: s2 [file s2]

marinedrugs-11-00165-s001.mol
  corina  07071423153D 1   1.00000     0.00000 
CORINA 3.49 0023  12.04.2013
 71 80  0  0  0  0  0  0  0  0999 V2000
   -0.0167    1.3824    0.0096 C   0  0  0  0  0  0  0  0  0  0  0  0
    0.0021   -0.0041    0.0020 C   0  0  0  0  0  0  0  0  0  0  0  0
    1.2153   -0.6817   -0.0133 C   0  0  0  0  0  0  0  0  0  0  0  0
    2.4085    0.0324   -0.0209 C   0  0  0  0  0  0  0  0  0  0  0  0
    2.3857    1.4187   -0.0132 C   0  0  0  0  0  0  0  0  0  0  0  0
    1.1739    2.0929    0.0021 C   0  0  0  0  0  0  0  0  0  0  0  0
    3.5965   -0.6283   -0.0353 O   0  0  0  0  0  0  0  0  0  0  0  0
    4.7392    0.1115   -0.0423 C   0  0  0  0  0  0  0  0  0  0  0  0
    5.3346    0.4836    1.1573 C   0  0  0  0  0  0  0  0  0  0  0  0
    4.7762    0.1084    2.3391 O   0  0  0  0  0  0  0  0  0  0  0  0
    5.3151    0.4909   -1.2492 C   0  0  0  0  0  0  0  0  0  0  0  0
    6.4788    1.2444   -1.2544 C   0  0  0  0  0  0  0  0  0  0  0  0
    7.0685    1.6192   -0.0566 C   0  0  0  0  0  0  0  0  0  0  0  0
    6.4983    1.2371    1.1483 C   0  0  0  0  0  0  0  0  0  0  0  0
    1.1534    3.4524    0.0100 O   0  0  0  0  0  0  0  0  0  0  0  0
    8.2103    2.3575   -0.0636 O   0  0  0  0  0  0  0  0  0  0  0  0
    1.2356   -2.0428   -0.0203 O   0  0  0  0  0  0  0  0  0  0  0  0
   -1.1660   -0.7003    0.0099 O   0  0  0  0  0  0  0  0  0  0  0  0
    1.2110   -1.9361   -2.3944 C   0  0  0  0  0  0  0  0  0  0  0  0
    1.2334   -2.6744   -1.2230 C   0  0  0  0  0  0  0  0  0  0  0  0
    1.2091   -2.5802   -3.6235 C   0  0  0  0  0  0  0  0  0  0  0  0
    1.2292   -3.9660   -3.6864 C   0  0  0  0  0  0  0  0  0  0  0  0
    1.2522   -4.7146   -2.5215 C   0  0  0  0  0  0  0  0  0  0  0  0
    1.2542   -4.0715   -1.2806 C   0  0  0  0  0  0  0  0  0  0  0  0
    1.2782   -4.8675   -0.0303 C   0  0  0  0  0  0  0  0  0  0  0  0
    2.4982   -5.2256    0.5498 C   0  0  0  0  0  0  0  0  0  0  0  0
    3.6661   -4.8448   -0.0313 O   0  0  0  0  0  0  0  0  0  0  0  0
    4.7377    0.1229   -2.4240 O   0  0  0  0  0  0  0  0  0  0  0  0
    0.0802   -5.2578    0.5763 C   0  0  0  0  0  0  0  0  0  0  0  0
    0.1088   -6.0010    1.7446 C   0  0  0  0  0  0  0  0  0  0  0  0
    1.3232   -6.3580    2.3130 C   0  0  0  0  0  0  0  0  0  0  0  0
    2.5148   -5.9689    1.7182 C   0  0  0  0  0  0  0  0  0  0  0  0
   -1.1093   -4.9085    0.0209 O   0  0  0  0  0  0  0  0  0  0  0  0
   -2.2494   -5.3107    0.6465 C   0  0  0  0  0  0  0  0  0  0  0  0
   -2.8360   -4.5008    1.6130 C   0  0  0  0  0  0  0  0  0  0  0  0
   -2.2702   -3.3058    1.9336 O   0  0  0  0  0  0  0  0  0  0  0  0
    1.2710   -6.0718   -2.5849 O   0  0  0  0  0  0  0  0  0  0  0  0
    1.1871   -1.8507   -4.7700 O   0  0  0  0  0  0  0  0  0  0  0  0
    1.3456   -7.0874    3.4596 O   0  0  0  0  0  0  0  0  0  0  0  0
   -2.8313   -6.5279    0.3162 C   0  0  0  0  0  0  0  0  0  0  0  0
   -3.9951   -6.9374    0.9548 C   0  0  0  0  0  0  0  0  0  0  0  0
   -4.5759   -6.1283    1.9233 C   0  0  0  0  0  0  0  0  0  0  0  0
   -3.9971   -4.9107    2.2493 C   0  0  0  0  0  0  0  0  0  0  0  0
   -2.2623   -7.3205   -0.6325 O   0  0  0  0  0  0  0  0  0  0  0  0
   -2.8341   -8.5136   -0.9560 C   0  0  0  0  0  0  0  0  0  0  0  0
   -3.9957   -8.9225   -0.3181 C   0  0  0  0  0  0  0  0  0  0  0  0
   -4.5650   -8.1311    0.6302 O   0  0  0  0  0  0  0  0  0  0  0  0
   -2.2519   -9.3228   -1.9269 C   0  0  0  0  0  0  0  0  0  0  0  0
   -2.8244  -10.5376   -2.2644 C   0  0  0  0  0  0  0  0  0  0  0  0
   -3.9880  -10.9601   -1.6350 C   0  0  0  0  0  0  0  0  0  0  0  0
   -4.5740  -10.1460   -0.6554 C   0  0  0  0  0  0  0  0  0  0  0  0
   -5.7723  -10.8739   -0.1955 C   0  0  0  0  0  0  0  0  0  0  0  0
   -5.8038  -12.0617   -0.9371 C   0  0  0  0  0  0  0  0  0  0  0  0
   -6.8366  -12.9712   -0.7227 C   0  0  0  0  0  0  0  0  0  0  0  0
   -7.8206  -12.6973    0.2164 C   0  0  0  0  0  0  0  0  0  0  0  0
   -7.7861  -11.5178    0.9497 C   0  0  0  0  0  0  0  0  0  0  0  0
   -6.7657  -10.6056    0.7474 C   0  0  0  0  0  0  0  0  0  0  0  0
   -6.2653  -16.4197   -1.6172 C   0  0  0  0  0  0  0  0  0  0  0  0
   -6.2467  -15.2176   -0.9252 C   0  0  0  0  0  0  0  0  0  0  0  0
   -6.8809  -14.1299   -1.4357 O   0  0  0  0  0  0  0  0  0  0  0  0
   -5.6184  -17.5298   -1.0958 C   0  0  0  0  0  0  0  0  0  0  0  0
   -4.9531  -17.4384    0.1176 C   0  0  0  0  0  0  0  0  0  0  0  0
   -4.9339  -16.2365    0.8093 C   0  0  0  0  0  0  0  0  0  0  0  0
   -5.5808  -15.1262    0.2882 C   0  0  0  0  0  0  0  0  0  0  0  0
   -5.7157   -6.5285    2.5493 O   0  0  0  0  0  0  0  0  0  0  0  0
   -1.1126   -8.9174   -2.5491 O   0  0  0  0  0  0  0  0  0  0  0  0
   -6.7307   -9.4516    1.4653 O   0  0  0  0  0  0  0  0  0  0  0  0
   -5.6366  -18.7075   -1.7736 O   0  0  0  0  0  0  0  0  0  0  0  0
   -4.7391  -12.0763   -1.7707 O   0  0  0  0  0  0  0  0  0  0  0  0
   -4.2827  -16.1474    1.9987 O   0  0  0  0  0  0  0  0  0  0  0  0
   -8.8265  -13.5897    0.4203 O   0  0  0  0  0  0  0  0  0  0  0  0
  1  2  1  0      
  2  3  2  0      
  3  4  1  0      
  4  5  2  0      
  5  6  1  0      
  6  1  2  0      
  4  7  1  0      
  7  8  1  0      
  8  9  1  0      
  9 10  1  0      
  8 11  2  0      
 11 12  1  0      
 12 13  2  0      
 13 14  1  0      
 14  9  2  0      
  6 15  1  0      
 13 16  1  0      
  3 17  1  0      
  2 18  1  0      
 19 20  2  0      
 20 17  1  0      
 19 21  1  0      
 21 22  2  0      
 22 23  1  0      
 23 24  2  0      
 24 20  1  0      
 24 25  1  0      
 25 26  2  0      
 26 27  1  0      
 11 28  1  0      
 25 29  1  0      
 29 30  2  0      
 30 31  1  0      
 31 32  2  0      
 32 26  1  0      
 29 33  1  0      
 33 34  1  0      
 34 35  2  0      
 35 36  1  0      
 23 37  1  0      
 21 38  1  0      
 31 39  1  0      
 34 40  1  0      
 40 41  2  0      
 41 42  1  0      
 42 43  2  0      
 43 35  1  0      
 40 44  1  0      
 44 45  1  0      
 45 46  1  0      
 46 47  1  0      
 47 41  1  0      
 45 48  2  0      
 48 49  1  0      
 49 50  2  0      
 50 51  1  0      
 51 46  2  0      
 51 52  1  0      
 52 53  2  0      
 53 54  1  0      
 54 55  2  0      
 55 56  1  0      
 56 57  2  0      
 57 52  1  0      
 58 59  2  0      
 59 60  1  0      
 60 54  1  0      
 58 61  1  0      
 61 62  2  0      
 62 63  1  0      
 63 64  2  0      
 64 59  1  0      
 42 65  1  0      
 48 66  1  0      
 57 67  1  0      
 61 68  1  0      
 50 69  1  0      
 53 69  1  0      
 63 70  1  0      
 55 71  1  0      
M  END
$$$$
