# Supplementary material for: Isolation and Structural Determination of Two Novel Phlorotannins from the Brown Alga Ecklonia kurome Okamura, and Their Radical Scavenging Activities
Source: MDPI journal article supplement (doi:10.3390/md11010165), 2013-01-18
Supplement: s3 [file s3]

marinedrugs-11-00165-s001.mol
  ChemDraw06021422322D

 71 80  0  0  0  0  0  0  0  0999 V2000
    1.0717    4.7437    0.0000 C   0  0  0  0  0  0  0  0  0  0  0  0
    1.0717    3.9187    0.0000 C   0  0  0  0  0  0  0  0  0  0  0  0
    1.7862    3.5062    0.0000 C   0  0  0  0  0  0  0  0  0  0  0  0
    2.5006    3.9187    0.0000 C   0  0  0  0  0  0  0  0  0  0  0  0
    2.5006    4.7437    0.0000 C   0  0  0  0  0  0  0  0  0  0  0  0
    1.7862    5.1562    0.0000 C   0  0  0  0  0  0  0  0  0  0  0  0
    3.2151    3.5062    0.0000 O   0  0  0  0  0  0  0  0  0  0  0  0
    3.9296    3.9187    0.0000 C   0  0  0  0  0  0  0  0  0  0  0  0
    3.9296    4.7437    0.0000 C   0  0  0  0  0  0  0  0  0  0  0  0
    3.2151    5.1562    0.0000 O   0  0  0  0  0  0  0  0  0  0  0  0
    4.6441    3.5062    0.0000 C   0  0  0  0  0  0  0  0  0  0  0  0
    5.3585    3.9187    0.0000 C   0  0  0  0  0  0  0  0  0  0  0  0
    5.3585    4.7437    0.0000 C   0  0  0  0  0  0  0  0  0  0  0  0
    4.6441    5.1562    0.0000 C   0  0  0  0  0  0  0  0  0  0  0  0
    1.7862    5.9812    0.0000 O   0  0  0  0  0  0  0  0  0  0  0  0
    6.0730    5.1562    0.0000 O   0  0  0  0  0  0  0  0  0  0  0  0
    1.7862    2.6812    0.0000 O   0  0  0  0  0  0  0  0  0  0  0  0
    0.3572    3.5062    0.0000 O   0  0  0  0  0  0  0  0  0  0  0  0
    0.3572    2.6812    0.0000 C   0  0  0  0  0  0  0  0  0  0  0  0
    1.0717    2.2688    0.0000 C   0  0  0  0  0  0  0  0  0  0  0  0
   -0.3572    2.2688    0.0000 C   0  0  0  0  0  0  0  0  0  0  0  0
   -0.3572    1.4438    0.0000 C   0  0  0  0  0  0  0  0  0  0  0  0
    0.3572    1.0313    0.0000 C   0  0  0  0  0  0  0  0  0  0  0  0
    1.0717    1.4438    0.0000 C   0  0  0  0  0  0  0  0  0  0  0  0
    1.7862    1.0313    0.0000 C   0  0  0  0  0  0  0  0  0  0  0  0
    2.5006    1.4438    0.0000 C   0  0  0  0  0  0  0  0  0  0  0  0
    2.5006    2.2688    0.0000 O   0  0  0  0  0  0  0  0  0  0  0  0
    4.6441    2.6812    0.0000 O   0  0  0  0  0  0  0  0  0  0  0  0
    1.7862    0.2063    0.0000 C   0  0  0  0  0  0  0  0  0  0  0  0
    2.5006   -0.2062    0.0000 C   0  0  0  0  0  0  0  0  0  0  0  0
    3.2151    0.2063    0.0000 C   0  0  0  0  0  0  0  0  0  0  0  0
    3.2151    1.0313    0.0000 C   0  0  0  0  0  0  0  0  0  0  0  0
    1.0717   -0.2062    0.0000 O   0  0  0  0  0  0  0  0  0  0  0  0
    1.0717   -1.0312    0.0000 C   0  0  0  0  0  0  0  0  0  0  0  0
    1.7862   -1.4437    0.0000 C   0  0  0  0  0  0  0  0  0  0  0  0
    2.5006   -1.0312    0.0000 O   0  0  0  0  0  0  0  0  0  0  0  0
    0.3572    0.2063    0.0000 O   0  0  0  0  0  0  0  0  0  0  0  0
   -1.0717    2.6813    0.0000 O   0  0  0  0  0  0  0  0  0  0  0  0
    3.9296   -0.2062    0.0000 O   0  0  0  0  0  0  0  0  0  0  0  0
    0.3572   -1.4437    0.0000 C   0  0  0  0  0  0  0  0  0  0  0  0
    0.3572   -2.2687    0.0000 C   0  0  0  0  0  0  0  0  0  0  0  0
    1.0717   -2.6812    0.0000 C   0  0  0  0  0  0  0  0  0  0  0  0
    1.7862   -2.2687    0.0000 C   0  0  0  0  0  0  0  0  0  0  0  0
   -0.3572   -1.0312    0.0000 O   0  0  0  0  0  0  0  0  0  0  0  0
   -1.0717   -1.4437    0.0000 C   0  0  0  0  0  0  0  0  0  0  0  0
   -1.0717   -2.2687    0.0000 C   0  0  0  0  0  0  0  0  0  0  0  0
   -0.3572   -2.6812    0.0000 O   0  0  0  0  0  0  0  0  0  0  0  0
   -1.7862   -1.0312    0.0000 C   0  0  0  0  0  0  0  0  0  0  0  0
   -2.5006   -1.4437    0.0000 C   0  0  0  0  0  0  0  0  0  0  0  0
   -2.5006   -2.2687    0.0000 C   0  0  0  0  0  0  0  0  0  0  0  0
   -1.7862   -2.6812    0.0000 C   0  0  0  0  0  0  0  0  0  0  0  0
   -1.7862   -3.5062    0.0000 C   0  0  0  0  0  0  0  0  0  0  0  0
   -2.5006   -3.9187    0.0000 C   0  0  0  0  0  0  0  0  0  0  0  0
   -2.5006   -4.7437    0.0000 C   0  0  0  0  0  0  0  0  0  0  0  0
   -1.7862   -5.1562    0.0000 C   0  0  0  0  0  0  0  0  0  0  0  0
   -1.0717   -4.7437    0.0000 C   0  0  0  0  0  0  0  0  0  0  0  0
   -1.0717   -3.9187    0.0000 C   0  0  0  0  0  0  0  0  0  0  0  0
   -3.9296   -3.9187    0.0000 C   0  0  0  0  0  0  0  0  0  0  0  0
   -3.9296   -4.7437    0.0000 C   0  0  0  0  0  0  0  0  0  0  0  0
   -3.2151   -5.1562    0.0000 O   0  0  0  0  0  0  0  0  0  0  0  0
   -4.6441   -3.5062    0.0000 C   0  0  0  0  0  0  0  0  0  0  0  0
   -5.3585   -3.9187    0.0000 C   0  0  0  0  0  0  0  0  0  0  0  0
   -5.3585   -4.7437    0.0000 C   0  0  0  0  0  0  0  0  0  0  0  0
   -4.6441   -5.1562    0.0000 C   0  0  0  0  0  0  0  0  0  0  0  0
    1.0717   -3.5062    0.0000 O   0  0  0  0  0  0  0  0  0  0  0  0
   -1.7862   -0.2062    0.0000 O   0  0  0  0  0  0  0  0  0  0  0  0
   -0.3572   -3.5062    0.0000 O   0  0  0  0  0  0  0  0  0  0  0  0
   -4.6441   -2.6812    0.0000 O   0  0  0  0  0  0  0  0  0  0  0  0
   -2.9576   -3.0319    0.0000 O   0  0  0  0  0  0  0  0  0  0  0  0
   -6.0730   -5.1562    0.0000 O   0  0  0  0  0  0  0  0  0  0  0  0
   -1.7862   -5.9812    0.0000 O   0  0  0  0  0  0  0  0  0  0  0  0
  1  2  1  0      
  2  3  2  0      
  3  4  1  0      
  4  5  2  0      
  5  6  1  0      
  6  1  2  0      
  4  7  1  0      
  7  8  1  0      
  8  9  1  0      
  9 10  1  0      
  8 11  2  0      
 11 12  1  0      
 12 13  2  0      
 13 14  1  0      
 14  9  2  0      
  6 15  1  0      
 13 16  1  0      
  3 17  1  0      
  2 18  1  0      
 19 20  2  0      
 20 17  1  0      
 19 21  1  0      
 21 22  2  0      
 22 23  1  0      
 23 24  2  0      
 24 20  1  0      
 24 25  1  0      
 25 26  2  0      
 26 27  1  0      
 11 28  1  0      
 25 29  1  0      
 29 30  2  0      
 30 31  1  0      
 31 32  2  0      
 32 26  1  0      
 29 33  1  0      
 33 34  1  0      
 34 35  2  0      
 35 36  1  0      
 23 37  1  0      
 21 38  1  0      
 31 39  1  0      
 34 40  1  0      
 40 41  2  0      
 41 42  1  0      
 42 43  2  0      
 43 35  1  0      
 40 44  1  0      
 44 45  1  0      
 45 46  1  0      
 46 47  1  0      
 47 41  1  0      
 45 48  2  0      
 48 49  1  0      
 49 50  2  0      
 50 51  1  0      
 51 46  2  0      
 51 52  1  0      
 52 53  2  0      
 53 54  1  0      
 54 55  2  0      
 55 56  1  0      
 56 57  2  0      
 57 52  1  0      
 58 59  2  0      
 59 60  1  0      
 60 54  1  0      
 58 61  1  0      
 61 62  2  0      
 62 63  1  0      
 63 64  2  0      
 64 59  1  0      
 42 65  1  0      
 48 66  1  0      
 57 67  1  0      
 61 68  1  0      
 50 69  1  0      
 53 69  1  0      
 63 70  1  0      
 55 71  1  0      
M  END
