# Supplementary material for: Isolation and Structural Determination of Two Novel Phlorotannins from the Brown Alga Ecklonia kurome Okamura, and Their Radical Scavenging Activities
Source: MDPI journal article supplement (doi:10.3390/md11010165), 2013-01-18
Supplement: s4 [file s4]

marinedrugs-11-00165-s002.mol
  corina  07071423153D 1   1.00000     0.00000 
CORINA 3.49 0023  12.04.2013
 71 80  0  0  0  0  0  0  0  0999 V2000
   -0.0168    1.3858    0.0097 C   0  0  0  0  0  0  0  0  0  0  0  0
    0.0021   -0.0041    0.0020 C   0  0  0  0  0  0  0  0  0  0  0  0
    1.2160   -0.6810   -0.0132 C   0  0  0  0  0  0  0  0  0  0  0  0
    2.4056    0.0309   -0.0207 C   0  0  0  0  0  0  0  0  0  0  0  0
    2.3849    1.4174   -0.0126 C   0  0  0  0  0  0  0  0  0  0  0  0
    1.1747    2.0944    0.0021 C   0  0  0  0  0  0  0  0  0  0  0  0
   -1.2033    2.0500    0.0189 O   0  0  0  0  0  0  0  0  0  0  0  0
   -1.1081   -0.6395   -2.3670 C   0  0  0  0  0  0  0  0  0  0  0  0
   -1.7270   -1.0220   -1.1867 C   0  0  0  0  0  0  0  0  0  0  0  0
   -1.1670   -0.7015    0.0099 O   0  0  0  0  0  0  0  0  0  0  0  0
   -1.6794   -0.9660   -3.5878 C   0  0  0  0  0  0  0  0  0  0  0  0
   -2.8701   -1.6752   -3.6304 C   0  0  0  0  0  0  0  0  0  0  0  0
   -3.4920   -2.0595   -2.4522 C   0  0  0  0  0  0  0  0  0  0  0  0
   -2.9212   -1.7334   -1.2277 C   0  0  0  0  0  0  0  0  0  0  0  0
    3.5526    2.1140   -0.0196 O   0  0  0  0  0  0  0  0  0  0  0  0
   -1.0714   -0.5897   -4.7443 O   0  0  0  0  0  0  0  0  0  0  0  0
    1.2368   -2.0406   -0.0203 O   0  0  0  0  0  0  0  0  0  0  0  0
   -4.6599   -2.7546   -2.4947 O   0  0  0  0  0  0  0  0  0  0  0  0
   -2.2712   -4.1233   -0.1746 C   0  0  0  0  0  0  0  0  0  0  0  0
   -3.2010   -3.3168    0.4602 C   0  0  0  0  0  0  0  0  0  0  0  0
   -3.5301   -2.1102   -0.0700 O   0  0  0  0  0  0  0  0  0  0  0  0
   -1.9346   -5.3562    0.3659 C   0  0  0  0  0  0  0  0  0  0  0  0
   -2.5265   -5.7880    1.5441 C   0  0  0  0  0  0  0  0  0  0  0  0
   -3.4575   -4.9899    2.1876 C   0  0  0  0  0  0  0  0  0  0  0  0
   -3.8006   -3.7471    1.6480 C   0  0  0  0  0  0  0  0  0  0  0  0
   -4.7962   -2.8882    2.3325 C   0  0  0  0  0  0  0  0  0  0  0  0
   -4.3807   -1.9610    3.2922 C   0  0  0  0  0  0  0  0  0  0  0  0
   -3.0623   -1.8442    3.5999 O   0  0  0  0  0  0  0  0  0  0  0  0
   -6.1539   -2.9987    2.0163 C   0  0  0  0  0  0  0  0  0  0  0  0
   -7.0794   -2.1936    2.6592 C   0  0  0  0  0  0  0  0  0  0  0  0
   -6.6616   -1.2788    3.6152 C   0  0  0  0  0  0  0  0  0  0  0  0
   -5.3151   -1.1611    3.9286 C   0  0  0  0  0  0  0  0  0  0  0  0
   -1.0219   -6.1439   -0.2615 O   0  0  0  0  0  0  0  0  0  0  0  0
   -7.5741   -0.4913    4.2430 O   0  0  0  0  0  0  0  0  0  0  0  0
   -4.0366   -5.4145    3.3412 O   0  0  0  0  0  0  0  0  0  0  0  0
   -6.5641   -3.8935    1.0802 O   0  0  0  0  0  0  0  0  0  0  0  0
   -7.8953   -3.9658    0.8053 C   0  0  0  0  0  0  0  0  0  0  0  0
   -8.4442   -3.1670   -0.1918 C   0  0  0  0  0  0  0  0  0  0  0  0
   -7.6506   -2.3129   -0.8928 O   0  0  0  0  0  0  0  0  0  0  0  0
   -8.7054   -4.8418    1.5168 C   0  0  0  0  0  0  0  0  0  0  0  0
  -10.0638   -4.9144    1.2351 C   0  0  0  0  0  0  0  0  0  0  0  0
  -10.6104   -4.1107    0.2420 C   0  0  0  0  0  0  0  0  0  0  0  0
   -9.7997   -3.2410   -0.4719 C   0  0  0  0  0  0  0  0  0  0  0  0
   -8.1687   -5.6281    2.4895 O   0  0  0  0  0  0  0  0  0  0  0  0
   -8.9634   -6.4873    3.1857 C   0  0  0  0  0  0  0  0  0  0  0  0
  -10.3258   -6.5613    2.9031 C   0  0  0  0  0  0  0  0  0  0  0  0
  -10.8597   -5.7726    1.9308 O   0  0  0  0  0  0  0  0  0  0  0  0
   -8.9985   -9.1370    5.9712 C   0  0  0  0  0  0  0  0  0  0  0  0
  -10.2462   -9.7114    6.2473 C   0  0  0  0  0  0  0  0  0  0  0  0
   -7.8671   -9.5316    6.6864 C   0  0  0  0  0  0  0  0  0  0  0  0
   -7.9792  -10.4953    7.6731 C   0  0  0  0  0  0  0  0  0  0  0  0
   -9.2143  -11.0671    7.9499 C   0  0  0  0  0  0  0  0  0  0  0  0
  -10.3440  -10.6798    7.2429 C   0  0  0  0  0  0  0  0  0  0  0  0
  -11.9407   -4.1815   -0.0342 O   0  0  0  0  0  0  0  0  0  0  0  0
  -11.5492  -11.2471    7.5234 O   0  0  0  0  0  0  0  0  0  0  0  0
  -12.3283  -10.6562    8.4666 C   0  0  0  0  0  0  0  0  0  0  0  0
  -13.5643  -11.1993    8.7851 C   0  0  0  0  0  0  0  0  0  0  0  0
  -11.8853   -9.5129    9.1153 C   0  0  0  0  0  0  0  0  0  0  0  0
  -12.6805   -8.9098   10.0780 C   0  0  0  0  0  0  0  0  0  0  0  0
  -13.9187   -9.4496   10.3922 C   0  0  0  0  0  0  0  0  0  0  0  0
  -14.3593  -10.5959    9.7478 C   0  0  0  0  0  0  0  0  0  0  0  0
   -9.3173  -12.0140    8.9208 O   0  0  0  0  0  0  0  0  0  0  0  0
  -12.2464   -7.7900   10.7138 O   0  0  0  0  0  0  0  0  0  0  0  0
  -15.5729  -11.1245   10.0556 O   0  0  0  0  0  0  0  0  0  0  0  0
   -6.6586   -8.9715    6.4143 O   0  0  0  0  0  0  0  0  0  0  0  0
   -8.4163   -7.2882    4.1750 C   0  0  0  0  0  0  0  0  0  0  0  0
   -9.2363   -8.1671    4.8854 C   0  0  0  0  0  0  0  0  0  0  0  0
  -10.6058   -8.2414    4.6018 C   0  0  0  0  0  0  0  0  0  0  0  0
  -11.1402   -7.4314    3.6064 C   0  0  0  0  0  0  0  0  0  0  0  0
   -7.0869   -7.2189    4.4526 O   0  0  0  0  0  0  0  0  0  0  0  0
  -11.1648   -9.1595    5.4225 O   0  0  0  0  0  0  0  0  0  0  0  0
  1  2  1  0      
  2  3  2  0      
  3  4  1  0      
  4  5  2  0      
  5  6  1  0      
  6  1  2  0      
  1  7  1  0      
  8  9  2  0      
  9 10  1  0      
 10  2  1  0      
  8 11  1  0      
 11 12  2  0      
 12 13  1  0      
 13 14  2  0      
 14  9  1  0      
  5 15  1  0      
 11 16  1  0      
  3 17  1  0      
 13 18  1  0      
 19 20  2  0      
 20 21  1  0      
 21 14  1  0      
 19 22  1  0      
 22 23  2  0      
 23 24  1  0      
 24 25  2  0      
 25 20  1  0      
 25 26  1  0      
 26 27  2  0      
 27 28  1  0      
 26 29  1  0      
 29 30  2  0      
 30 31  1  0      
 31 32  2  0      
 32 27  1  0      
 22 33  1  0      
 31 34  1  0      
 24 35  1  0      
 36 29  1  0      
 36 37  1  0      
 37 38  2  0      
 38 39  1  0      
 37 40  1  0      
 40 41  2  0      
 41 42  1  0      
 42 43  2  0      
 43 38  1  0      
 40 44  1  0      
 44 45  1  0      
 45 46  1  0      
 46 47  1  0      
 47 41  1  0      
 48 49  1  0      
 48 50  2  0      
 50 51  1  0      
 51 52  2  0      
 52 53  1  0      
 53 49  2  0      
 42 54  1  0      
 53 55  1  0      
 55 56  1  0      
 56 57  1  0      
 56 58  2  0      
 58 59  1  0      
 59 60  2  0      
 60 61  1  0      
 61 57  2  0      
 52 62  1  0      
 59 63  1  0      
 61 64  1  0      
 50 65  1  0      
 45 66  2  0      
 66 67  1  0      
 67 68  2  0      
 68 69  1  0      
 69 46  2  0      
 66 70  1  0      
 48 67  1  0      
 49 71  1  0      
 68 71  1  0      
M  END
$$$$
