# Supplementary material for: Isolation and Structural Determination of Two Novel Phlorotannins from the Brown Alga Ecklonia kurome Okamura, and Their Radical Scavenging Activities
Source: MDPI journal article supplement (doi:10.3390/md11010165), 2013-01-18
Supplement: s5 [file s5]

marinedrugs-11-00165-s002.mol
  ChemDraw06021422322D

 71 80  0  0  0  0  0  0  0  0999 V2000
    4.3149    3.7434    0.0000 C   0  0  0  0  0  0  0  0  0  0  0  0
    4.3149    2.9184    0.0000 C   0  0  0  0  0  0  0  0  0  0  0  0
    5.0293    2.5059    0.0000 C   0  0  0  0  0  0  0  0  0  0  0  0
    5.7438    2.9184    0.0000 C   0  0  0  0  0  0  0  0  0  0  0  0
    5.7438    3.7434    0.0000 C   0  0  0  0  0  0  0  0  0  0  0  0
    5.0293    4.1559    0.0000 C   0  0  0  0  0  0  0  0  0  0  0  0
    3.6004    4.1559    0.0000 O   0  0  0  0  0  0  0  0  0  0  0  0
    2.8859    3.7434    0.0000 C   0  0  0  0  0  0  0  0  0  0  0  0
    2.8859    2.9184    0.0000 C   0  0  0  0  0  0  0  0  0  0  0  0
    3.6004    2.5059    0.0000 O   0  0  0  0  0  0  0  0  0  0  0  0
    2.1714    4.1559    0.0000 C   0  0  0  0  0  0  0  0  0  0  0  0
    1.4570    3.7434    0.0000 C   0  0  0  0  0  0  0  0  0  0  0  0
    1.4570    2.9184    0.0000 C   0  0  0  0  0  0  0  0  0  0  0  0
    2.1714    2.5059    0.0000 C   0  0  0  0  0  0  0  0  0  0  0  0
    6.4583    4.1559    0.0000 O   0  0  0  0  0  0  0  0  0  0  0  0
    2.1714    4.9809    0.0000 O   0  0  0  0  0  0  0  0  0  0  0  0
    5.0293    1.6809    0.0000 O   0  0  0  0  0  0  0  0  0  0  0  0
    0.7425    2.5059    0.0000 O   0  0  0  0  0  0  0  0  0  0  0  0
    0.7425    1.6809    0.0000 C   0  0  0  0  0  0  0  0  0  0  0  0
    1.4570    1.2684    0.0000 C   0  0  0  0  0  0  0  0  0  0  0  0
    2.1714    1.6809    0.0000 O   0  0  0  0  0  0  0  0  0  0  0  0
    0.0280    1.2684    0.0000 C   0  0  0  0  0  0  0  0  0  0  0  0
    0.0280    0.4434    0.0000 C   0  0  0  0  0  0  0  0  0  0  0  0
    0.7425    0.0309    0.0000 C   0  0  0  0  0  0  0  0  0  0  0  0
    1.4570    0.4434    0.0000 C   0  0  0  0  0  0  0  0  0  0  0  0
    2.1714    0.0309    0.0000 C   0  0  0  0  0  0  0  0  0  0  0  0
    2.8859    0.4434    0.0000 C   0  0  0  0  0  0  0  0  0  0  0  0
    2.8859    1.2684    0.0000 O   0  0  0  0  0  0  0  0  0  0  0  0
    2.1714   -0.7941    0.0000 C   0  0  0  0  0  0  0  0  0  0  0  0
    2.8859   -1.2066    0.0000 C   0  0  0  0  0  0  0  0  0  0  0  0
    3.6004   -0.7941    0.0000 C   0  0  0  0  0  0  0  0  0  0  0  0
    3.6004    0.0309    0.0000 C   0  0  0  0  0  0  0  0  0  0  0  0
   -0.6864    1.6809    0.0000 O   0  0  0  0  0  0  0  0  0  0  0  0
    4.3149   -1.2066    0.0000 O   0  0  0  0  0  0  0  0  0  0  0  0
    0.7425   -0.7941    0.0000 O   0  0  0  0  0  0  0  0  0  0  0  0
    1.4570   -1.2066    0.0000 O   0  0  0  0  0  0  0  0  0  0  0  0
    1.4570   -2.0316    0.0000 C   0  0  0  0  0  0  0  0  0  0  0  0
    2.1714   -2.4441    0.0000 C   0  0  0  0  0  0  0  0  0  0  0  0
    2.8859   -2.0316    0.0000 O   0  0  0  0  0  0  0  0  0  0  0  0
    0.7425   -2.4441    0.0000 C   0  0  0  0  0  0  0  0  0  0  0  0
    0.7425   -3.2691    0.0000 C   0  0  0  0  0  0  0  0  0  0  0  0
    1.4570   -3.6816    0.0000 C   0  0  0  0  0  0  0  0  0  0  0  0
    2.1714   -3.2691    0.0000 C   0  0  0  0  0  0  0  0  0  0  0  0
    0.0280   -2.0316    0.0000 O   0  0  0  0  0  0  0  0  0  0  0  0
   -0.6864   -2.4441    0.0000 C   0  0  0  0  0  0  0  0  0  0  0  0
   -0.6864   -3.2691    0.0000 C   0  0  0  0  0  0  0  0  0  0  0  0
    0.0280   -3.6816    0.0000 O   0  0  0  0  0  0  0  0  0  0  0  0
   -2.8859   -2.0934    0.0000 C   0  0  0  0  0  0  0  0  0  0  0  0
   -3.6004   -2.5059    0.0000 C   0  0  0  0  0  0  0  0  0  0  0  0
   -2.8859   -1.2684    0.0000 C   0  0  0  0  0  0  0  0  0  0  0  0
   -3.6004   -0.8559    0.0000 C   0  0  0  0  0  0  0  0  0  0  0  0
   -4.3149   -1.2684    0.0000 C   0  0  0  0  0  0  0  0  0  0  0  0
   -4.3149   -2.0934    0.0000 C   0  0  0  0  0  0  0  0  0  0  0  0
    1.4570   -4.5066    0.0000 O   0  0  0  0  0  0  0  0  0  0  0  0
   -5.0293   -2.5059    0.0000 O   0  0  0  0  0  0  0  0  0  0  0  0
   -5.0293   -3.3309    0.0000 C   0  0  0  0  0  0  0  0  0  0  0  0
   -4.3149   -3.7434    0.0000 C   0  0  0  0  0  0  0  0  0  0  0  0
   -5.7438   -3.7434    0.0000 C   0  0  0  0  0  0  0  0  0  0  0  0
   -5.7438   -4.5684    0.0000 C   0  0  0  0  0  0  0  0  0  0  0  0
   -5.0293   -4.9809    0.0000 C   0  0  0  0  0  0  0  0  0  0  0  0
   -4.3149   -4.5684    0.0000 C   0  0  0  0  0  0  0  0  0  0  0  0
   -5.0293   -0.8559    0.0000 O   0  0  0  0  0  0  0  0  0  0  0  0
   -6.4583   -4.9809    0.0000 O   0  0  0  0  0  0  0  0  0  0  0  0
   -3.6004   -4.9809    0.0000 O   0  0  0  0  0  0  0  0  0  0  0  0
   -2.1714   -0.8559    0.0000 O   0  0  0  0  0  0  0  0  0  0  0  0
   -1.4009   -2.0316    0.0000 C   0  0  0  0  0  0  0  0  0  0  0  0
   -2.1154   -2.4441    0.0000 C   0  0  0  0  0  0  0  0  0  0  0  0
   -2.1154   -3.2691    0.0000 C   0  0  0  0  0  0  0  0  0  0  0  0
   -1.4009   -3.6816    0.0000 C   0  0  0  0  0  0  0  0  0  0  0  0
   -1.4009   -1.2066    0.0000 O   0  0  0  0  0  0  0  0  0  0  0  0
   -3.1588   -3.2691    0.0000 O   0  0  0  0  0  0  0  0  0  0  0  0
  1  2  1  0      
  2  3  2  0      
  3  4  1  0      
  4  5  2  0      
  5  6  1  0      
  6  1  2  0      
  1  7  1  0      
  8  9  2  0      
  9 10  1  0      
 10  2  1  0      
  8 11  1  0      
 11 12  2  0      
 12 13  1  0      
 13 14  2  0      
 14  9  1  0      
  5 15  1  0      
 11 16  1  0      
  3 17  1  0      
 13 18  1  0      
 19 20  2  0      
 20 21  1  0      
 21 14  1  0      
 19 22  1  0      
 22 23  2  0      
 23 24  1  0      
 24 25  2  0      
 25 20  1  0      
 25 26  1  0      
 26 27  2  0      
 27 28  1  0      
 26 29  1  0      
 29 30  2  0      
 30 31  1  0      
 31 32  2  0      
 32 27  1  0      
 22 33  1  0      
 31 34  1  0      
 24 35  1  0      
 36 29  1  0      
 36 37  1  0      
 37 38  2  0      
 38 39  1  0      
 37 40  1  0      
 40 41  2  0      
 41 42  1  0      
 42 43  2  0      
 43 38  1  0      
 40 44  1  0      
 44 45  1  0      
 45 46  1  0      
 46 47  1  0      
 47 41  1  0      
 48 49  1  0      
 48 50  2  0      
 50 51  1  0      
 51 52  2  0      
 52 53  1  0      
 53 49  2  0      
 42 54  1  0      
 53 55  1  0      
 55 56  1  0      
 56 57  1  0      
 56 58  2  0      
 58 59  1  0      
 59 60  2  0      
 60 61  1  0      
 61 57  2  0      
 52 62  1  0      
 59 63  1  0      
 61 64  1  0      
 50 65  1  0      
 45 66  2  0      
 66 67  1  0      
 67 68  2  0      
 68 69  1  0      
 69 46  2  0      
 66 70  1  0      
 48 67  1  0      
 49 71  1  0      
 68 71  1  0      
M  END
