# Supplementary material for: Isolation and Structural Determination of Two Novel Phlorotannins from the Brown Alga Ecklonia kurome Okamura, and Their Radical Scavenging Activities
Source: MDPI journal article supplement (doi:10.3390/md11010165), 2013-01-18
Supplement: s6 [file s6]

marinedrugs-11-00165-s003.mol
  corina  07071423153D 1   1.00000     0.00000 
CORINA 3.49 0023  12.04.2013
 44 50  0  0  0  0  0  0  0  0999 V2000
   -0.0167    1.3829    0.0096 C   0  0  0  0  0  0  0  0  0  0  0  0
    0.0021   -0.0041    0.0020 C   0  0  0  0  0  0  0  0  0  0  0  0
    1.2127   -0.6811   -0.0132 C   0  0  0  0  0  0  0  0  0  0  0  0
    2.4039    0.0288   -0.0207 C   0  0  0  0  0  0  0  0  0  0  0  0
    2.3849    1.4155   -0.0127 C   0  0  0  0  0  0  0  0  0  0  0  0
    1.1746    2.0925    0.0021 C   0  0  0  0  0  0  0  0  0  0  0  0
   -1.1651   -0.6994    0.0099 O   0  0  0  0  0  0  0  0  0  0  0  0
   -1.0990   -2.0591    0.0019 C   0  0  0  0  0  0  0  0  0  0  0  0
   -1.0533   -2.7608    1.2017 C   0  0  0  0  0  0  0  0  0  0  0  0
   -1.0741   -2.0882    2.3842 O   0  0  0  0  0  0  0  0  0  0  0  0
   -1.0830   -2.7473   -1.2044 C   0  0  0  0  0  0  0  0  0  0  0  0
   -1.0161   -4.1349   -1.2115 C   0  0  0  0  0  0  0  0  0  0  0  0
   -0.9657   -4.8328   -0.0114 C   0  0  0  0  0  0  0  0  0  0  0  0
   -0.9870   -4.1451    1.1931 C   0  0  0  0  0  0  0  0  0  0  0  0
    1.1562    3.4513    0.0096 O   0  0  0  0  0  0  0  0  0  0  0  0
    3.5899   -0.6344   -0.0356 O   0  0  0  0  0  0  0  0  0  0  0  0
   -0.9006   -6.1918   -0.0173 O   0  0  0  0  0  0  0  0  0  0  0  0
   -1.1324   -2.0637   -2.3801 O   0  0  0  0  0  0  0  0  0  0  0  0
   -1.1172   -2.7396   -3.5623 C   0  0  0  0  0  0  0  0  0  0  0  0
   -1.0500   -4.1249   -3.5694 C   0  0  0  0  0  0  0  0  0  0  0  0
   -1.0005   -4.8089   -2.3949 O   0  0  0  0  0  0  0  0  0  0  0  0
   -1.1687   -2.0396   -4.7638 C   0  0  0  0  0  0  0  0  0  0  0  0
   -1.1544   -2.7159   -5.9721 C   0  0  0  0  0  0  0  0  0  0  0  0
   -1.0878   -4.1029   -5.9951 C   0  0  0  0  0  0  0  0  0  0  0  0
   -1.0345   -4.8087   -4.7848 C   0  0  0  0  0  0  0  0  0  0  0  0
   -1.2341   -0.6812   -4.7513 O   0  0  0  0  0  0  0  0  0  0  0  0
   -0.9716   -6.2351   -5.1567 C   0  0  0  0  0  0  0  0  0  0  0  0
   -0.9924   -6.2645   -6.5569 C   0  0  0  0  0  0  0  0  0  0  0  0
   -0.9429   -7.4919   -7.2132 C   0  0  0  0  0  0  0  0  0  0  0  0
   -0.8743   -8.6691   -6.4819 C   0  0  0  0  0  0  0  0  0  0  0  0
   -0.8543   -8.6359   -5.0932 C   0  0  0  0  0  0  0  0  0  0  0  0
   -0.9031   -7.4237   -4.4282 C   0  0  0  0  0  0  0  0  0  0  0  0
    0.2553   -7.5427  -10.6162 C   0  0  0  0  0  0  0  0  0  0  0  0
    0.2266   -7.4993   -9.2300 C   0  0  0  0  0  0  0  0  0  0  0  0
   -0.9623   -7.5368   -8.5736 O   0  0  0  0  0  0  0  0  0  0  0  0
    1.4688   -7.5049  -11.2860 C   0  0  0  0  0  0  0  0  0  0  0  0
    2.6538   -7.4238  -10.5701 C   0  0  0  0  0  0  0  0  0  0  0  0
    2.6254   -7.3805   -9.1843 C   0  0  0  0  0  0  0  0  0  0  0  0
    1.4120   -7.4182   -8.5141 C   0  0  0  0  0  0  0  0  0  0  0  0
   -1.0602   -4.9931   -7.0126 O   0  0  0  0  0  0  0  0  0  0  0  0
    1.4970   -7.5478  -12.6440 O   0  0  0  0  0  0  0  0  0  0  0  0
    3.7867   -7.3010   -8.4830 O   0  0  0  0  0  0  0  0  0  0  0  0
   -0.8267   -9.8642   -7.1293 O   0  0  0  0  0  0  0  0  0  0  0  0
   -0.8834   -7.3902   -3.0693 O   0  0  0  0  0  0  0  0  0  0  0  0
  1  2  1  0      
  2  3  2  0      
  3  4  1  0      
  4  5  2  0      
  5  6  1  0      
  6  1  2  0      
  2  7  1  0      
  7  8  1  0      
  8  9  2  0      
  9 10  1  0      
  8 11  1  0      
 11 12  2  0      
 12 13  1  0      
 13 14  2  0      
 14  9  1  0      
  6 15  1  0      
  4 16  1  0      
 13 17  1  0      
 11 18  1  0      
 18 19  1  0      
 19 20  1  0      
 20 21  1  0      
 21 12  1  0      
 19 22  2  0      
 22 23  1  0      
 23 24  2  0      
 24 25  1  0      
 25 20  2  0      
 22 26  1  0      
 25 27  1  0      
 27 28  2  0      
 28 29  1  0      
 29 30  2  0      
 30 31  1  0      
 31 32  2  0      
 32 27  1  0      
 33 34  2  0      
 34 35  1  0      
 35 29  1  0      
 33 36  1  0      
 36 37  2  0      
 37 38  1  0      
 38 39  2  0      
 39 34  1  0      
 24 40  1  0      
 28 40  1  0      
 36 41  1  0      
 38 42  1  0      
 30 43  1  0      
 32 44  1  0      
M  END
$$$$
