# Supplementary material for: Isolation and Structural Determination of Two Novel Phlorotannins from the Brown Alga Ecklonia kurome Okamura, and Their Radical Scavenging Activities
Source: MDPI journal article supplement (doi:10.3390/md11010165), 2013-01-18
Supplement: s7 [file s7]

marinedrugs-11-00165-s003.mol
  ChemDraw06021422322D

 44 50  0  0  0  0  0  0  0  0999 V2000
    2.8579    2.8875    0.0000 C   0  0  0  0  0  0  0  0  0  0  0  0
    2.8579    2.0625    0.0000 C   0  0  0  0  0  0  0  0  0  0  0  0
    3.5724    1.6500    0.0000 C   0  0  0  0  0  0  0  0  0  0  0  0
    4.2868    2.0625    0.0000 C   0  0  0  0  0  0  0  0  0  0  0  0
    4.2868    2.8875    0.0000 C   0  0  0  0  0  0  0  0  0  0  0  0
    3.5724    3.3000    0.0000 C   0  0  0  0  0  0  0  0  0  0  0  0
    2.1434    1.6500    0.0000 O   0  0  0  0  0  0  0  0  0  0  0  0
    2.1434    0.8250    0.0000 C   0  0  0  0  0  0  0  0  0  0  0  0
    2.8579    0.4125    0.0000 C   0  0  0  0  0  0  0  0  0  0  0  0
    3.5724    0.8250    0.0000 O   0  0  0  0  0  0  0  0  0  0  0  0
    1.4289    0.4125    0.0000 C   0  0  0  0  0  0  0  0  0  0  0  0
    1.4289   -0.4125    0.0000 C   0  0  0  0  0  0  0  0  0  0  0  0
    2.1434   -0.8250    0.0000 C   0  0  0  0  0  0  0  0  0  0  0  0
    2.8579   -0.4125    0.0000 C   0  0  0  0  0  0  0  0  0  0  0  0
    3.5724    4.1250    0.0000 O   0  0  0  0  0  0  0  0  0  0  0  0
    5.0013    1.6500    0.0000 O   0  0  0  0  0  0  0  0  0  0  0  0
    2.1434   -1.6500    0.0000 O   0  0  0  0  0  0  0  0  0  0  0  0
    0.7145    0.8250    0.0000 O   0  0  0  0  0  0  0  0  0  0  0  0
   -0.0000    0.4125    0.0000 C   0  0  0  0  0  0  0  0  0  0  0  0
   -0.0000   -0.4125    0.0000 C   0  0  0  0  0  0  0  0  0  0  0  0
    0.7145   -0.8250    0.0000 O   0  0  0  0  0  0  0  0  0  0  0  0
   -0.7145    0.8250    0.0000 C   0  0  0  0  0  0  0  0  0  0  0  0
   -1.4289    0.4125    0.0000 C   0  0  0  0  0  0  0  0  0  0  0  0
   -1.4289   -0.4125    0.0000 C   0  0  0  0  0  0  0  0  0  0  0  0
   -0.7145   -0.8250    0.0000 C   0  0  0  0  0  0  0  0  0  0  0  0
   -0.7145    1.6500    0.0000 O   0  0  0  0  0  0  0  0  0  0  0  0
   -0.7145   -1.6500    0.0000 C   0  0  0  0  0  0  0  0  0  0  0  0
   -1.4289   -2.0625    0.0000 C   0  0  0  0  0  0  0  0  0  0  0  0
   -1.4289   -2.8875    0.0000 C   0  0  0  0  0  0  0  0  0  0  0  0
   -0.7145   -3.3000    0.0000 C   0  0  0  0  0  0  0  0  0  0  0  0
   -0.0000   -2.8875    0.0000 C   0  0  0  0  0  0  0  0  0  0  0  0
   -0.0000   -2.0625    0.0000 C   0  0  0  0  0  0  0  0  0  0  0  0
   -2.8579   -2.0625    0.0000 C   0  0  0  0  0  0  0  0  0  0  0  0
   -2.8579   -2.8875    0.0000 C   0  0  0  0  0  0  0  0  0  0  0  0
   -2.1434   -3.3000    0.0000 O   0  0  0  0  0  0  0  0  0  0  0  0
   -3.5724   -1.6500    0.0000 C   0  0  0  0  0  0  0  0  0  0  0  0
   -4.2868   -2.0625    0.0000 C   0  0  0  0  0  0  0  0  0  0  0  0
   -4.2868   -2.8875    0.0000 C   0  0  0  0  0  0  0  0  0  0  0  0
   -3.5724   -3.3000    0.0000 C   0  0  0  0  0  0  0  0  0  0  0  0
   -1.9758   -1.1963    0.0000 O   0  0  0  0  0  0  0  0  0  0  0  0
   -3.5724   -0.8250    0.0000 O   0  0  0  0  0  0  0  0  0  0  0  0
   -5.0013   -3.3000    0.0000 O   0  0  0  0  0  0  0  0  0  0  0  0
   -0.7145   -4.1250    0.0000 O   0  0  0  0  0  0  0  0  0  0  0  0
    0.7145   -1.6500    0.0000 O   0  0  0  0  0  0  0  0  0  0  0  0
  1  2  1  0      
  2  3  2  0      
  3  4  1  0      
  4  5  2  0      
  5  6  1  0      
  6  1  2  0      
  2  7  1  0      
  7  8  1  0      
  8  9  2  0      
  9 10  1  0      
  8 11  1  0      
 11 12  2  0      
 12 13  1  0      
 13 14  2  0      
 14  9  1  0      
  6 15  1  0      
  4 16  1  0      
 13 17  1  0      
 11 18  1  0      
 18 19  1  0      
 19 20  1  0      
 20 21  1  0      
 21 12  1  0      
 19 22  2  0      
 22 23  1  0      
 23 24  2  0      
 24 25  1  0      
 25 20  2  0      
 22 26  1  0      
 25 27  1  0      
 27 28  2  0      
 28 29  1  0      
 29 30  2  0      
 30 31  1  0      
 31 32  2  0      
 32 27  1  0      
 33 34  2  0      
 34 35  1  0      
 35 29  1  0      
 33 36  1  0      
 36 37  2  0      
 37 38  1  0      
 38 39  2  0      
 39 34  1  0      
 24 40  1  0      
 28 40  1  0      
 36 41  1  0      
 38 42  1  0      
 30 43  1  0      
 32 44  1  0      
M  END
