# Supplementary material for: Isolation and Structural Determination of Two Novel Phlorotannins from the Brown Alga Ecklonia kurome Okamura, and Their Radical Scavenging Activities
Source: MDPI journal article supplement (doi:10.3390/md11010165), 2013-01-18
Supplement: s8 [file s8]

marinedrugs-11-00165-s004.mol
  ChemDraw06021422332D

 44 50  0  0  0  0  0  0  0  0999 V2000
    3.2151    1.8562    0.0000 C   0  0  0  0  0  0  0  0  0  0  0  0
    3.2151    1.0312    0.0000 C   0  0  0  0  0  0  0  0  0  0  0  0
    3.9296    0.6187    0.0000 C   0  0  0  0  0  0  0  0  0  0  0  0
    4.6441    1.0312    0.0000 C   0  0  0  0  0  0  0  0  0  0  0  0
    4.6441    1.8562    0.0000 C   0  0  0  0  0  0  0  0  0  0  0  0
    3.9296    2.2687    0.0000 C   0  0  0  0  0  0  0  0  0  0  0  0
    3.9296    3.0937    0.0000 O   0  0  0  0  0  0  0  0  0  0  0  0
    5.3585    0.6187    0.0000 O   0  0  0  0  0  0  0  0  0  0  0  0
    2.5006    0.6187    0.0000 O   0  0  0  0  0  0  0  0  0  0  0  0
    2.5006   -0.2063    0.0000 C   0  0  0  0  0  0  0  0  0  0  0  0
    3.2151   -0.6188    0.0000 C   0  0  0  0  0  0  0  0  0  0  0  0
    3.9296   -0.2063    0.0000 O   0  0  0  0  0  0  0  0  0  0  0  0
    1.7862   -0.6188    0.0000 C   0  0  0  0  0  0  0  0  0  0  0  0
    1.7862   -1.4438    0.0000 C   0  0  0  0  0  0  0  0  0  0  0  0
    2.5006   -1.8562    0.0000 C   0  0  0  0  0  0  0  0  0  0  0  0
    3.2151   -1.4438    0.0000 C   0  0  0  0  0  0  0  0  0  0  0  0
    1.0717   -0.2063    0.0000 O   0  0  0  0  0  0  0  0  0  0  0  0
    0.3572   -0.6188    0.0000 C   0  0  0  0  0  0  0  0  0  0  0  0
    0.3572   -1.4438    0.0000 C   0  0  0  0  0  0  0  0  0  0  0  0
    1.0717   -1.8562    0.0000 O   0  0  0  0  0  0  0  0  0  0  0  0
   -0.3572   -0.2063    0.0000 C   0  0  0  0  0  0  0  0  0  0  0  0
   -1.0717   -0.6188    0.0000 C   0  0  0  0  0  0  0  0  0  0  0  0
   -1.0717   -1.4438    0.0000 C   0  0  0  0  0  0  0  0  0  0  0  0
   -0.3572   -1.8562    0.0000 C   0  0  0  0  0  0  0  0  0  0  0  0
   -0.3572    0.6187    0.0000 O   0  0  0  0  0  0  0  0  0  0  0  0
   -1.0717    1.0312    0.0000 O   0  0  0  0  0  0  0  0  0  0  0  0
   -1.7862    0.6187    0.0000 C   0  0  0  0  0  0  0  0  0  0  0  0
   -1.7862   -0.2063    0.0000 C   0  0  0  0  0  0  0  0  0  0  0  0
   -2.5006    1.0312    0.0000 C   0  0  0  0  0  0  0  0  0  0  0  0
   -3.2151    0.6187    0.0000 C   0  0  0  0  0  0  0  0  0  0  0  0
   -3.2151   -0.2063    0.0000 C   0  0  0  0  0  0  0  0  0  0  0  0
   -2.5006   -0.6187    0.0000 C   0  0  0  0  0  0  0  0  0  0  0  0
   -3.9296   -0.6187    0.0000 O   0  0  0  0  0  0  0  0  0  0  0  0
   -3.9296   -1.4437    0.0000 C   0  0  0  0  0  0  0  0  0  0  0  0
   -3.2151   -1.8562    0.0000 C   0  0  0  0  0  0  0  0  0  0  0  0
   -4.6441   -1.8562    0.0000 C   0  0  0  0  0  0  0  0  0  0  0  0
   -4.6441   -2.6812    0.0000 C   0  0  0  0  0  0  0  0  0  0  0  0
   -3.9296   -3.0937    0.0000 C   0  0  0  0  0  0  0  0  0  0  0  0
   -3.2151   -2.6812    0.0000 C   0  0  0  0  0  0  0  0  0  0  0  0
    2.5006   -2.6812    0.0000 O   0  0  0  0  0  0  0  0  0  0  0  0
   -3.9296    1.0312    0.0000 O   0  0  0  0  0  0  0  0  0  0  0  0
   -2.5006   -3.0937    0.0000 O   0  0  0  0  0  0  0  0  0  0  0  0
   -5.3585   -3.0937    0.0000 O   0  0  0  0  0  0  0  0  0  0  0  0
   -2.1135   -1.4438    0.0000 O   0  0  0  0  0  0  0  0  0  0  0  0
  1  2  1  0      
  2  3  2  0      
  3  4  1  0      
  4  5  2  0      
  5  6  1  0      
  6  1  2  0      
  6  7  1  0      
  4  8  1  0      
  2  9  1  0      
  9 10  1  0      
 10 11  2  0      
 11 12  1  0      
 10 13  1  0      
 13 14  2  0      
 14 15  1  0      
 15 16  2  0      
 16 11  1  0      
 13 17  1  0      
 17 18  1  0      
 18 19  1  0      
 19 20  1  0      
 20 14  1  0      
 18 21  2  0      
 21 22  1  0      
 22 23  2  0      
 23 24  1  0      
 24 19  2  0      
 21 25  1  0      
 26 27  1  0      
 27 28  2  0      
 28 22  1  0      
 27 29  1  0      
 29 30  2  0      
 30 31  1  0      
 31 32  2  0      
 32 28  1  0      
 31 33  1  0      
 33 34  1  0      
 34 35  1  0      
 34 36  2  0      
 36 37  1  0      
 37 38  2  0      
 38 39  1  0      
 39 35  2  0      
 15 40  1  0      
 30 41  1  0      
 39 42  1  0      
 37 43  1  0      
 32 44  1  0      
 23 44  1  0      
M  END
