# Supplementary material for: Isolation and Structural Determination of Two Novel Phlorotannins from the Brown Alga Ecklonia kurome Okamura, and Their Radical Scavenging Activities
Source: MDPI journal article supplement (doi:10.3390/md11010165), 2013-01-18
Supplement: s9 [file s9]

marinedrugs-11-00165-s004.mol
  corina  07071423163D 1   1.00000     0.00000 
CORINA 3.49 0023  12.04.2013
 44 50  0  0  0  0  0  0  0  0999 V2000
   -0.0167    1.3829    0.0096 C   0  0  0  0  0  0  0  0  0  0  0  0
    0.0021   -0.0041    0.0020 C   0  0  0  0  0  0  0  0  0  0  0  0
    1.2127   -0.6811   -0.0132 C   0  0  0  0  0  0  0  0  0  0  0  0
    2.4039    0.0288   -0.0207 C   0  0  0  0  0  0  0  0  0  0  0  0
    2.3849    1.4155   -0.0127 C   0  0  0  0  0  0  0  0  0  0  0  0
    1.1746    2.0925    0.0021 C   0  0  0  0  0  0  0  0  0  0  0  0
    1.1562    3.4513    0.0100 O   0  0  0  0  0  0  0  0  0  0  0  0
    3.5899   -0.6344   -0.0356 O   0  0  0  0  0  0  0  0  0  0  0  0
   -1.1651   -0.6994    0.0099 O   0  0  0  0  0  0  0  0  0  0  0  0
   -1.0990   -2.0591    0.0019 C   0  0  0  0  0  0  0  0  0  0  0  0
   -1.0533   -2.7605    1.2016 C   0  0  0  0  0  0  0  0  0  0  0  0
   -1.0741   -2.0879    2.3840 O   0  0  0  0  0  0  0  0  0  0  0  0
   -1.0830   -2.7473   -1.2047 C   0  0  0  0  0  0  0  0  0  0  0  0
   -1.0161   -4.1348   -1.2117 C   0  0  0  0  0  0  0  0  0  0  0  0
   -0.9652   -4.8325   -0.0112 C   0  0  0  0  0  0  0  0  0  0  0  0
   -0.9870   -4.1449    1.1931 C   0  0  0  0  0  0  0  0  0  0  0  0
   -1.1325   -2.0621   -2.3795 O   0  0  0  0  0  0  0  0  0  0  0  0
   -1.1178   -2.7373   -3.5620 C   0  0  0  0  0  0  0  0  0  0  0  0
   -1.0516   -4.1291   -3.5703 C   0  0  0  0  0  0  0  0  0  0  0  0
   -1.0008   -4.8112   -2.3935 O   0  0  0  0  0  0  0  0  0  0  0  0
   -1.1693   -2.0384   -4.7570 C   0  0  0  0  0  0  0  0  0  0  0  0
   -1.1540   -2.7356   -5.9664 C   0  0  0  0  0  0  0  0  0  0  0  0
   -1.0870   -4.1346   -5.9758 C   0  0  0  0  0  0  0  0  0  0  0  0
   -1.0368   -4.8218   -4.7683 C   0  0  0  0  0  0  0  0  0  0  0  0
   -1.2348   -0.6801   -4.7520 O   0  0  0  0  0  0  0  0  0  0  0  0
   -1.3090    0.0572   -7.3086 O   0  0  0  0  0  0  0  0  0  0  0  0
   -1.2642   -1.0929   -8.0322 C   0  0  0  0  0  0  0  0  0  0  0  0
   -1.1949   -2.3263   -7.3831 C   0  0  0  0  0  0  0  0  0  0  0  0
   -1.2877   -1.0447   -9.4149 C   0  0  0  0  0  0  0  0  0  0  0  0
   -1.2428   -2.2205  -10.1526 C   0  0  0  0  0  0  0  0  0  0  0  0
   -1.1729   -3.4508   -9.5139 C   0  0  0  0  0  0  0  0  0  0  0  0
   -1.1490   -3.5148   -8.1233 C   0  0  0  0  0  0  0  0  0  0  0  0
   -1.1298   -4.5964  -10.2480 O   0  0  0  0  0  0  0  0  0  0  0  0
    0.0883   -5.0754  -10.6118 C   0  0  0  0  0  0  0  0  0  0  0  0
    0.1807   -6.2397  -11.3602 C   0  0  0  0  0  0  0  0  0  0  0  0
    1.2398   -4.3971  -10.2397 C   0  0  0  0  0  0  0  0  0  0  0  0
    2.4830   -4.8862  -10.6111 C   0  0  0  0  0  0  0  0  0  0  0  0
    2.5754   -6.0533  -11.3544 C   0  0  0  0  0  0  0  0  0  0  0  0
    1.4241   -6.7284  -11.7314 C   0  0  0  0  0  0  0  0  0  0  0  0
   -0.9001   -6.1915   -0.0169 O   0  0  0  0  0  0  0  0  0  0  0  0
   -1.2667   -2.1660  -11.5113 O   0  0  0  0  0  0  0  0  0  0  0  0
    1.5148   -7.8723  -12.4595 O   0  0  0  0  0  0  0  0  0  0  0  0
    3.6110   -4.2215  -10.2469 O   0  0  0  0  0  0  0  0  0  0  0  0
   -1.0861   -4.5550   -7.2613 O   0  0  0  0  0  0  0  0  0  0  0  0
  1  2  1  0      
  2  3  2  0      
  3  4  1  0      
  4  5  2  0      
  5  6  1  0      
  6  1  2  0      
  6  7  1  0      
  4  8  1  0      
  2  9  1  0      
  9 10  1  0      
 10 11  2  0      
 11 12  1  0      
 10 13  1  0      
 13 14  2  0      
 14 15  1  0      
 15 16  2  0      
 16 11  1  0      
 13 17  1  0      
 17 18  1  0      
 18 19  1  0      
 19 20  1  0      
 20 14  1  0      
 18 21  2  0      
 21 22  1  0      
 22 23  2  0      
 23 24  1  0      
 24 19  2  0      
 21 25  1  0      
 26 27  1  0      
 27 28  2  0      
 28 22  1  0      
 27 29  1  0      
 29 30  2  0      
 30 31  1  0      
 31 32  2  0      
 32 28  1  0      
 31 33  1  0      
 33 34  1  0      
 34 35  1  0      
 34 36  2  0      
 36 37  1  0      
 37 38  2  0      
 38 39  1  0      
 39 35  2  0      
 15 40  1  0      
 30 41  1  0      
 39 42  1  0      
 37 43  1  0      
 32 44  1  0      
 23 44  1  0      
M  END
$$$$
