# Supplementary material for: Isolation and Structural Determination of Two Novel Phlorotannins from the Brown Alga Ecklonia kurome Okamura, and Their Radical Scavenging Activities
Source: MDPI journal article supplement (doi:10.3390/md11010165), 2013-01-18
Supplement: s10 [file s10]

marinedrugs-11-00165-s005.mol
  corina  07071423163D 1   1.00000     0.00000 
CORINA 3.49 0023  12.04.2013
  9  9  0  0  0  0  0  0  0  0999 V2000
   -0.0167    1.3825    0.0096 C   0  0  0  0  0  0  0  0  0  0  0  0
    0.0021   -0.0041    0.0020 C   0  0  0  0  0  0  0  0  0  0  0  0
    1.2123   -0.6810   -0.0132 C   0  0  0  0  0  0  0  0  0  0  0  0
    2.4037    0.0286   -0.0213 C   0  0  0  0  0  0  0  0  0  0  0  0
    2.3849    1.4152   -0.0146 C   0  0  0  0  0  0  0  0  0  0  0  0
    1.1747    2.0922    0.0021 C   0  0  0  0  0  0  0  0  0  0  0  0
    3.5524    2.1107   -0.0216 O   0  0  0  0  0  0  0  0  0  0  0  0
   -1.2027    2.0459    0.0189 O   0  0  0  0  0  0  0  0  0  0  0  0
    1.2307   -2.0398   -0.0198 O   0  0  0  0  0  0  0  0  0  0  0  0
  1  2  1  0      
  2  3  2  0      
  3  4  1  0      
  4  5  2  0      
  5  6  1  0      
  6  1  2  0      
  5  7  1  0      
  1  8  1  0      
  3  9  1  0      
M  END
$$$$
