# Supplementary material for: Isolation and Structural Determination of Two Novel Phlorotannins from the Brown Alga Ecklonia kurome Okamura, and Their Radical Scavenging Activities
Source: MDPI journal article supplement (doi:10.3390/md11010165), 2013-01-18
Supplement: s11 [file s11]

marinedrugs-11-00165-s005.mol
  ChemDraw06021422332D

  9  9  0  0  0  0  0  0  0  0999 V2000
   -0.7145    0.8250    0.0000 C   0  0  0  0  0  0  0  0  0  0  0  0
   -0.7145    0.0000    0.0000 C   0  0  0  0  0  0  0  0  0  0  0  0
    0.0000   -0.4125    0.0000 C   0  0  0  0  0  0  0  0  0  0  0  0
    0.7145    0.0000    0.0000 C   0  0  0  0  0  0  0  0  0  0  0  0
    0.7145    0.8250    0.0000 C   0  0  0  0  0  0  0  0  0  0  0  0
    0.0000    1.2375    0.0000 C   0  0  0  0  0  0  0  0  0  0  0  0
    1.4289    1.2375    0.0000 O   0  0  0  0  0  0  0  0  0  0  0  0
   -1.4289    1.2375    0.0000 O   0  0  0  0  0  0  0  0  0  0  0  0
    0.0000   -1.2375    0.0000 O   0  0  0  0  0  0  0  0  0  0  0  0
  1  2  1  0      
  2  3  2  0      
  3  4  1  0      
  4  5  2  0      
  5  6  1  0      
  6  1  2  0      
  5  7  1  0      
  1  8  1  0      
  3  9  1  0      
M  END
