# Supplementary material for: Isolation and Structural Determination of Two Novel Phlorotannins from the Brown Alga Ecklonia kurome Okamura, and Their Radical Scavenging Activities
Source: MDPI journal article supplement (doi:10.3390/md11010165), 2013-01-18
Supplement: s12 [file s12]

marinedrugs-11-00165-s006.mol
  corina  07071423163D 1   1.00000     0.00000 
CORINA 3.49 0023  12.04.2013
 36 39  0  0  0  0  0  0  0  0999 V2000
   -0.0167    1.3824    0.0096 C   0  0  0  0  0  0  0  0  0  0  0  0
    0.0021   -0.0041    0.0020 C   0  0  0  0  0  0  0  0  0  0  0  0
    1.2153   -0.6817   -0.0132 C   0  0  0  0  0  0  0  0  0  0  0  0
    2.4085    0.0324   -0.0207 C   0  0  0  0  0  0  0  0  0  0  0  0
    2.3857    1.4187   -0.0131 C   0  0  0  0  0  0  0  0  0  0  0  0
    1.1739    2.0929    0.0021 C   0  0  0  0  0  0  0  0  0  0  0  0
    3.5965   -0.6283   -0.0351 O   0  0  0  0  0  0  0  0  0  0  0  0
    4.7392    0.1115   -0.0421 C   0  0  0  0  0  0  0  0  0  0  0  0
    5.3345    0.4836    1.1576 C   0  0  0  0  0  0  0  0  0  0  0  0
    4.7758    0.1088    2.3394 O   0  0  0  0  0  0  0  0  0  0  0  0
    5.3152    0.4909   -1.2489 C   0  0  0  0  0  0  0  0  0  0  0  0
    6.4792    1.2439   -1.2541 C   0  0  0  0  0  0  0  0  0  0  0  0
    7.0688    1.6187   -0.0562 C   0  0  0  0  0  0  0  0  0  0  0  0
    6.4985    1.2367    1.1487 C   0  0  0  0  0  0  0  0  0  0  0  0
   -1.1660   -0.7003    0.0099 O   0  0  0  0  0  0  0  0  0  0  0  0
    1.2111   -1.9361   -2.3944 C   0  0  0  0  0  0  0  0  0  0  0  0
    1.2334   -2.6744   -1.2229 C   0  0  0  0  0  0  0  0  0  0  0  0
    1.2356   -2.0428   -0.0202 O   0  0  0  0  0  0  0  0  0  0  0  0
    1.2084   -2.5802   -3.6234 C   0  0  0  0  0  0  0  0  0  0  0  0
    1.2276   -3.9660   -3.6863 C   0  0  0  0  0  0  0  0  0  0  0  0
    1.2505   -4.7145   -2.5214 C   0  0  0  0  0  0  0  0  0  0  0  0
    1.2533   -4.0715   -1.2806 C   0  0  0  0  0  0  0  0  0  0  0  0
    1.2778   -4.8674   -0.0302 C   0  0  0  0  0  0  0  0  0  0  0  0
    2.4982   -5.2260    0.5494 C   0  0  0  0  0  0  0  0  0  0  0  0
    3.6659   -4.8456   -0.0323 O   0  0  0  0  0  0  0  0  0  0  0  0
    1.2684   -6.0718   -2.5847 O   0  0  0  0  0  0  0  0  0  0  0  0
   -1.1095   -4.9081    0.0213 O   0  0  0  0  0  0  0  0  0  0  0  0
    0.0804   -5.2573    0.5768 C   0  0  0  0  0  0  0  0  0  0  0  0
    0.1092   -6.0002    1.7448 C   0  0  0  0  0  0  0  0  0  0  0  0
    1.3235   -6.3578    2.3129 C   0  0  0  0  0  0  0  0  0  0  0  0
    2.5151   -5.9691    1.7176 C   0  0  0  0  0  0  0  0  0  0  0  0
    8.2104    2.3573   -0.0632 O   0  0  0  0  0  0  0  0  0  0  0  0
    4.7376    0.1232   -2.4238 O   0  0  0  0  0  0  0  0  0  0  0  0
    1.1534    3.4524    0.0091 O   0  0  0  0  0  0  0  0  0  0  0  0
    1.1864   -1.8507   -4.7699 O   0  0  0  0  0  0  0  0  0  0  0  0
    1.3459   -7.0867    3.4597 O   0  0  0  0  0  0  0  0  0  0  0  0
  1  2  1  0      
  2  3  2  0      
  3  4  1  0      
  4  5  2  0      
  5  6  1  0      
  6  1  2  0      
  4  7  1  0      
  7  8  1  0      
  8  9  1  0      
  9 10  1  0      
  8 11  2  0      
 11 12  1  0      
 12 13  2  0      
 13 14  1  0      
 14  9  2  0      
  2 15  1  0      
 16 17  2  0      
 17 18  1  0      
 18  3  1  0      
 16 19  1  0      
 19 20  2  0      
 20 21  1  0      
 21 22  2  0      
 22 17  1  0      
 22 23  1  0      
 23 24  1  0      
 24 25  1  0      
 21 26  1  0      
 27 28  1  0      
 28 23  2  0      
 28 29  1  0      
 29 30  2  0      
 30 31  1  0      
 31 24  2  0      
 13 32  1  0      
 11 33  1  0      
  6 34  1  0      
 19 35  1  0      
 30 36  1  0      
M  END
$$$$
