# Supplementary material for: Isolation and Structural Determination of Two Novel Phlorotannins from the Brown Alga Ecklonia kurome Okamura, and Their Radical Scavenging Activities
Source: MDPI journal article supplement (doi:10.3390/md11010165), 2013-01-18
Supplement: s13 [file s13]

marinedrugs-11-00165-s006.mol
  ChemDraw06021422332D

 36 39  0  0  0  0  0  0  0  0999 V2000
   -1.4289    1.8563    0.0000 C   0  0  0  0  0  0  0  0  0  0  0  0
   -1.4289    1.0313    0.0000 C   0  0  0  0  0  0  0  0  0  0  0  0
   -0.7145    0.6188    0.0000 C   0  0  0  0  0  0  0  0  0  0  0  0
    0.0000    1.0313    0.0000 C   0  0  0  0  0  0  0  0  0  0  0  0
    0.0000    1.8563    0.0000 C   0  0  0  0  0  0  0  0  0  0  0  0
   -0.7145    2.2687    0.0000 C   0  0  0  0  0  0  0  0  0  0  0  0
    0.7145    0.6188    0.0000 O   0  0  0  0  0  0  0  0  0  0  0  0
    1.4289    1.0313    0.0000 C   0  0  0  0  0  0  0  0  0  0  0  0
    1.4289    1.8563    0.0000 C   0  0  0  0  0  0  0  0  0  0  0  0
    0.7145    2.2687    0.0000 O   0  0  0  0  0  0  0  0  0  0  0  0
    2.1434    0.6188    0.0000 C   0  0  0  0  0  0  0  0  0  0  0  0
    2.8579    1.0313    0.0000 C   0  0  0  0  0  0  0  0  0  0  0  0
    2.8579    1.8563    0.0000 C   0  0  0  0  0  0  0  0  0  0  0  0
    2.1434    2.2687    0.0000 C   0  0  0  0  0  0  0  0  0  0  0  0
   -2.1434    0.6188    0.0000 O   0  0  0  0  0  0  0  0  0  0  0  0
   -2.1434   -0.2062    0.0000 C   0  0  0  0  0  0  0  0  0  0  0  0
   -1.4289   -0.6188    0.0000 C   0  0  0  0  0  0  0  0  0  0  0  0
   -0.7145   -0.2062    0.0000 O   0  0  0  0  0  0  0  0  0  0  0  0
   -2.8579   -0.6188    0.0000 C   0  0  0  0  0  0  0  0  0  0  0  0
   -2.8579   -1.4438    0.0000 C   0  0  0  0  0  0  0  0  0  0  0  0
   -2.1434   -1.8563    0.0000 C   0  0  0  0  0  0  0  0  0  0  0  0
   -1.4289   -1.4438    0.0000 C   0  0  0  0  0  0  0  0  0  0  0  0
   -0.7145   -1.8563    0.0000 C   0  0  0  0  0  0  0  0  0  0  0  0
    0.0000   -1.4438    0.0000 C   0  0  0  0  0  0  0  0  0  0  0  0
    0.0000   -0.6188    0.0000 O   0  0  0  0  0  0  0  0  0  0  0  0
   -2.1434   -2.6812    0.0000 O   0  0  0  0  0  0  0  0  0  0  0  0
   -1.4289   -3.0938    0.0000 O   0  0  0  0  0  0  0  0  0  0  0  0
   -0.7145   -2.6812    0.0000 C   0  0  0  0  0  0  0  0  0  0  0  0
    0.0000   -3.0938    0.0000 C   0  0  0  0  0  0  0  0  0  0  0  0
    0.7145   -2.6812    0.0000 C   0  0  0  0  0  0  0  0  0  0  0  0
    0.7145   -1.8563    0.0000 C   0  0  0  0  0  0  0  0  0  0  0  0
    3.5724    2.2687    0.0000 O   0  0  0  0  0  0  0  0  0  0  0  0
    2.1434   -0.2062    0.0000 O   0  0  0  0  0  0  0  0  0  0  0  0
   -0.7145    3.0938    0.0000 O   0  0  0  0  0  0  0  0  0  0  0  0
   -3.5724   -0.2062    0.0000 O   0  0  0  0  0  0  0  0  0  0  0  0
    1.4289   -3.0938    0.0000 O   0  0  0  0  0  0  0  0  0  0  0  0
  1  2  1  0      
  2  3  2  0      
  3  4  1  0      
  4  5  2  0      
  5  6  1  0      
  6  1  2  0      
  4  7  1  0      
  7  8  1  0      
  8  9  1  0      
  9 10  1  0      
  8 11  2  0      
 11 12  1  0      
 12 13  2  0      
 13 14  1  0      
 14  9  2  0      
  2 15  1  0      
 16 17  2  0      
 17 18  1  0      
 18  3  1  0      
 16 19  1  0      
 19 20  2  0      
 20 21  1  0      
 21 22  2  0      
 22 17  1  0      
 22 23  1  0      
 23 24  1  0      
 24 25  1  0      
 21 26  1  0      
 27 28  1  0      
 28 23  2  0      
 28 29  1  0      
 29 30  2  0      
 30 31  1  0      
 31 24  2  0      
 13 32  1  0      
 11 33  1  0      
  6 34  1  0      
 19 35  1  0      
 30 36  1  0      
M  END
