# Supplementary material for: Isolation and Structural Determination of Two Novel Phlorotannins from the Brown Alga Ecklonia kurome Okamura, and Their Radical Scavenging Activities
Source: MDPI journal article supplement (doi:10.3390/md11010165), 2013-01-18
Supplement: s14 [file s14]

marinedrugs-11-00165-s007.mol
  corina  07071423163D 1   1.00000     0.00000 
CORINA 3.49 0023  12.04.2013
 27 29  0  0  0  0  0  0  0  0999 V2000
   -0.0168    1.3858    0.0097 C   0  0  0  0  0  0  0  0  0  0  0  0
    0.0021   -0.0041    0.0020 C   0  0  0  0  0  0  0  0  0  0  0  0
    1.2160   -0.6810   -0.0132 C   0  0  0  0  0  0  0  0  0  0  0  0
    2.4056    0.0309   -0.0207 C   0  0  0  0  0  0  0  0  0  0  0  0
    2.3849    1.4174   -0.0131 C   0  0  0  0  0  0  0  0  0  0  0  0
    1.1747    2.0944    0.0021 C   0  0  0  0  0  0  0  0  0  0  0  0
   -1.2033    2.0500    0.0189 O   0  0  0  0  0  0  0  0  0  0  0  0
   -1.1081   -0.6395   -2.3670 C   0  0  0  0  0  0  0  0  0  0  0  0
   -1.7270   -1.0220   -1.1867 C   0  0  0  0  0  0  0  0  0  0  0  0
   -1.1670   -0.7015    0.0099 O   0  0  0  0  0  0  0  0  0  0  0  0
   -1.6794   -0.9660   -3.5878 C   0  0  0  0  0  0  0  0  0  0  0  0
   -2.8701   -1.6752   -3.6304 C   0  0  0  0  0  0  0  0  0  0  0  0
   -3.4919   -2.0594   -2.4521 C   0  0  0  0  0  0  0  0  0  0  0  0
   -2.9212   -1.7333   -1.2277 C   0  0  0  0  0  0  0  0  0  0  0  0
    3.5526    2.1140   -0.0201 O   0  0  0  0  0  0  0  0  0  0  0  0
    1.2368   -2.0406   -0.0203 O   0  0  0  0  0  0  0  0  0  0  0  0
   -1.0714   -0.5897   -4.7443 O   0  0  0  0  0  0  0  0  0  0  0  0
   -4.6599   -2.7546   -2.4946 O   0  0  0  0  0  0  0  0  0  0  0  0
   -3.7962   -3.7423    1.6389 C   0  0  0  0  0  0  0  0  0  0  0  0
   -3.2009   -3.3169    0.4604 C   0  0  0  0  0  0  0  0  0  0  0  0
   -3.5301   -2.1102   -0.0700 O   0  0  0  0  0  0  0  0  0  0  0  0
   -3.4597   -4.9737    2.1803 C   0  0  0  0  0  0  0  0  0  0  0  0
   -2.5278   -5.7798    1.5439 C   0  0  0  0  0  0  0  0  0  0  0  0
   -1.9330   -5.3549    0.3654 C   0  0  0  0  0  0  0  0  0  0  0  0
   -2.2691   -4.1235   -0.1763 C   0  0  0  0  0  0  0  0  0  0  0  0
   -4.0429   -5.3905    3.3349 O   0  0  0  0  0  0  0  0  0  0  0  0
   -1.0192   -6.1446   -0.2576 O   0  0  0  0  0  0  0  0  0  0  0  0
  1  2  1  0      
  2  3  2  0      
  3  4  1  0      
  4  5  2  0      
  5  6  1  0      
  6  1  2  0      
  1  7  1  0      
  8  9  2  0      
  9 10  1  0      
 10  2  1  0      
  8 11  1  0      
 11 12  2  0      
 12 13  1  0      
 13 14  2  0      
 14  9  1  0      
  5 15  1  0      
  3 16  1  0      
 11 17  1  0      
 13 18  1  0      
 19 20  2  0      
 20 21  1  0      
 21 14  1  0      
 19 22  1  0      
 22 23  2  0      
 23 24  1  0      
 24 25  2  0      
 25 20  1  0      
 22 26  1  0      
 24 27  1  0      
M  END
$$$$
