# Supplementary material for: Isolation and Structural Determination of Two Novel Phlorotannins from the Brown Alga Ecklonia kurome Okamura, and Their Radical Scavenging Activities
Source: MDPI journal article supplement (doi:10.3390/md11010165), 2013-01-18
Supplement: s15 [file s15]

marinedrugs-11-00165-s007.mol
  ChemDraw06021422342D

 27 29  0  0  0  0  0  0  0  0999 V2000
    1.4289    1.6500    0.0000 C   0  0  0  0  0  0  0  0  0  0  0  0
    1.4289    0.8250    0.0000 C   0  0  0  0  0  0  0  0  0  0  0  0
    2.1434    0.4125    0.0000 C   0  0  0  0  0  0  0  0  0  0  0  0
    2.8579    0.8250    0.0000 C   0  0  0  0  0  0  0  0  0  0  0  0
    2.8579    1.6500    0.0000 C   0  0  0  0  0  0  0  0  0  0  0  0
    2.1434    2.0625    0.0000 C   0  0  0  0  0  0  0  0  0  0  0  0
    0.7145    2.0625    0.0000 O   0  0  0  0  0  0  0  0  0  0  0  0
    0.0000    1.6500    0.0000 C   0  0  0  0  0  0  0  0  0  0  0  0
    0.0000    0.8250    0.0000 C   0  0  0  0  0  0  0  0  0  0  0  0
    0.7145    0.4125    0.0000 O   0  0  0  0  0  0  0  0  0  0  0  0
   -0.7145    2.0625    0.0000 C   0  0  0  0  0  0  0  0  0  0  0  0
   -1.4289    1.6500    0.0000 C   0  0  0  0  0  0  0  0  0  0  0  0
   -1.4289    0.8250    0.0000 C   0  0  0  0  0  0  0  0  0  0  0  0
   -0.7145    0.4125    0.0000 C   0  0  0  0  0  0  0  0  0  0  0  0
    3.5724    2.0625    0.0000 O   0  0  0  0  0  0  0  0  0  0  0  0
    2.1434   -0.4125    0.0000 O   0  0  0  0  0  0  0  0  0  0  0  0
   -0.7145    2.8875    0.0000 O   0  0  0  0  0  0  0  0  0  0  0  0
   -2.1434    0.4125    0.0000 O   0  0  0  0  0  0  0  0  0  0  0  0
   -2.1434   -0.4125    0.0000 C   0  0  0  0  0  0  0  0  0  0  0  0
   -1.4289   -0.8250    0.0000 C   0  0  0  0  0  0  0  0  0  0  0  0
   -0.7145   -0.4125    0.0000 O   0  0  0  0  0  0  0  0  0  0  0  0
   -2.8579   -0.8250    0.0000 C   0  0  0  0  0  0  0  0  0  0  0  0
   -2.8579   -1.6500    0.0000 C   0  0  0  0  0  0  0  0  0  0  0  0
   -2.1434   -2.0625    0.0000 C   0  0  0  0  0  0  0  0  0  0  0  0
   -1.4289   -1.6500    0.0000 C   0  0  0  0  0  0  0  0  0  0  0  0
   -3.5724   -0.4125    0.0000 O   0  0  0  0  0  0  0  0  0  0  0  0
   -2.1434   -2.8875    0.0000 O   0  0  0  0  0  0  0  0  0  0  0  0
  1  2  1  0      
  2  3  2  0      
  3  4  1  0      
  4  5  2  0      
  5  6  1  0      
  6  1  2  0      
  1  7  1  0      
  8  9  2  0      
  9 10  1  0      
 10  2  1  0      
  8 11  1  0      
 11 12  2  0      
 12 13  1  0      
 13 14  2  0      
 14  9  1  0      
  5 15  1  0      
  3 16  1  0      
 11 17  1  0      
 13 18  1  0      
 19 20  2  0      
 20 21  1  0      
 21 14  1  0      
 19 22  1  0      
 22 23  2  0      
 23 24  1  0      
 24 25  2  0      
 25 20  1  0      
 22 26  1  0      
 24 27  1  0      
M  END
