# Supplementary material for: Isolation and Structural Determination of Two Novel Phlorotannins from the Brown Alga Ecklonia kurome Okamura, and Their Radical Scavenging Activities
Source: MDPI journal article supplement (doi:10.3390/md11010165), 2013-01-18
Supplement: s16 [file s16]

marinedrugs-11-00165-s008.mol
  corina  07071423163D 1   1.00000     0.00000 
CORINA 3.49 0023  12.04.2013
 54 61  0  0  0  0  0  0  0  0999 V2000
   -0.0167    1.3829    0.0096 C   0  0  0  0  0  0  0  0  0  0  0  0
    0.0021   -0.0041    0.0020 C   0  0  0  0  0  0  0  0  0  0  0  0
    1.2127   -0.6811   -0.0132 C   0  0  0  0  0  0  0  0  0  0  0  0
    2.4039    0.0288   -0.0207 C   0  0  0  0  0  0  0  0  0  0  0  0
    2.3849    1.4155   -0.0127 C   0  0  0  0  0  0  0  0  0  0  0  0
    1.1746    2.0925    0.0021 C   0  0  0  0  0  0  0  0  0  0  0  0
    1.1562    3.4513    0.0100 O   0  0  0  0  0  0  0  0  0  0  0  0
    3.5899   -0.6344   -0.0356 O   0  0  0  0  0  0  0  0  0  0  0  0
   -1.1651   -0.6994    0.0099 O   0  0  0  0  0  0  0  0  0  0  0  0
   -1.0990   -2.0591    0.0019 C   0  0  0  0  0  0  0  0  0  0  0  0
   -1.0533   -2.7605    1.2017 C   0  0  0  0  0  0  0  0  0  0  0  0
   -1.0746   -2.0878    2.3840 O   0  0  0  0  0  0  0  0  0  0  0  0
   -1.0830   -2.7472   -1.2046 C   0  0  0  0  0  0  0  0  0  0  0  0
   -1.0161   -4.1347   -1.2111 C   0  0  0  0  0  0  0  0  0  0  0  0
   -0.9652   -4.8326   -0.0109 C   0  0  0  0  0  0  0  0  0  0  0  0
   -0.9865   -4.1449    1.1934 C   0  0  0  0  0  0  0  0  0  0  0  0
   -1.1334   -2.0624   -2.3798 O   0  0  0  0  0  0  0  0  0  0  0  0
   -1.1188   -2.7382   -3.5622 C   0  0  0  0  0  0  0  0  0  0  0  0
   -1.0518   -4.1268   -3.5684 C   0  0  0  0  0  0  0  0  0  0  0  0
   -0.9999   -4.8104   -2.3936 O   0  0  0  0  0  0  0  0  0  0  0  0
   -1.1704   -2.0407   -4.7621 C   0  0  0  0  0  0  0  0  0  0  0  0
   -1.1550   -2.7307   -5.9655 C   0  0  0  0  0  0  0  0  0  0  0  0
   -1.0882   -4.1155   -5.9704 C   0  0  0  0  0  0  0  0  0  0  0  0
   -1.0366   -4.8134   -4.7717 C   0  0  0  0  0  0  0  0  0  0  0  0
   -0.8996   -6.1916   -0.0168 O   0  0  0  0  0  0  0  0  0  0  0  0
   -1.2364   -0.6824   -4.7573 O   0  0  0  0  0  0  0  0  0  0  0  0
   -1.0732   -4.7904   -7.1502 O   0  0  0  0  0  0  0  0  0  0  0  0
   -1.1254   -4.0660   -8.3016 C   0  0  0  0  0  0  0  0  0  0  0  0
    0.0498   -3.6377   -8.9080 C   0  0  0  0  0  0  0  0  0  0  0  0
    1.2526   -3.9420   -8.3513 O   0  0  0  0  0  0  0  0  0  0  0  0
   -2.3537   -3.7587   -8.8752 C   0  0  0  0  0  0  0  0  0  0  0  0
   -2.4051   -3.0214  -10.0479 C   0  0  0  0  0  0  0  0  0  0  0  0
   -1.2317   -2.5906  -10.6492 C   0  0  0  0  0  0  0  0  0  0  0  0
   -0.0050   -2.9005  -10.0806 C   0  0  0  0  0  0  0  0  0  0  0  0
   -3.5043   -4.1816   -8.2865 O   0  0  0  0  0  0  0  0  0  0  0  0
   -1.2838   -1.8684  -11.7996 O   0  0  0  0  0  0  0  0  0  0  0  0
   -0.1080   -1.4662  -12.3554 C   0  0  0  0  0  0  0  0  0  0  0  0
    0.5382   -2.2786  -13.2807 C   0  0  0  0  0  0  0  0  0  0  0  0
   -0.0045   -3.4761  -13.6303 O   0  0  0  0  0  0  0  0  0  0  0  0
    0.4443   -0.2412  -12.0031 C   0  0  0  0  0  0  0  0  0  0  0  0
    1.6440    0.1681  -12.5716 C   0  0  0  0  0  0  0  0  0  0  0  0
    2.2899   -0.6481  -13.4917 C   0  0  0  0  0  0  0  0  0  0  0  0
    1.7348   -1.8684  -13.8472 C   0  0  0  0  0  0  0  0  0  0  0  0
   -0.1897    0.5577  -11.1019 O   0  0  0  0  0  0  0  0  0  0  0  0
    0.3522    1.7590  -10.7581 C   0  0  0  0  0  0  0  0  0  0  0  0
    1.5527    2.1683  -11.3271 C   0  0  0  0  0  0  0  0  0  0  0  0
    2.1866    1.3687  -12.2265 O   0  0  0  0  0  0  0  0  0  0  0  0
   -0.2937    2.5753   -9.8389 C   0  0  0  0  0  0  0  0  0  0  0  0
    0.2602    3.7985   -9.4897 C   0  0  0  0  0  0  0  0  0  0  0  0
    1.4569    4.2056  -10.0581 C   0  0  0  0  0  0  0  0  0  0  0  0
    2.1034    3.3904  -10.9764 C   0  0  0  0  0  0  0  0  0  0  0  0
    3.4649   -0.2476  -14.0487 O   0  0  0  0  0  0  0  0  0  0  0  0
   -1.4684    2.1763   -9.2818 O   0  0  0  0  0  0  0  0  0  0  0  0
    1.9984    5.4047   -9.7152 O   0  0  0  0  0  0  0  0  0  0  0  0
  1  2  1  0      
  2  3  2  0      
  3  4  1  0      
  4  5  2  0      
  5  6  1  0      
  6  1  2  0      
  6  7  1  0      
  4  8  1  0      
  2  9  1  0      
  9 10  1  0      
 10 11  2  0      
 11 12  1  0      
 10 13  1  0      
 13 14  2  0      
 14 15  1  0      
 15 16  2  0      
 16 11  1  0      
 13 17  1  0      
 17 18  1  0      
 18 19  1  0      
 19 20  1  0      
 20 14  1  0      
 18 21  2  0      
 21 22  1  0      
 22 23  2  0      
 23 24  1  0      
 24 19  2  0      
 15 25  1  0      
 21 26  1  0      
 23 27  1  0      
 27 28  1  0      
 28 29  1  0      
 29 30  1  0      
 28 31  2  0      
 31 32  1  0      
 32 33  2  0      
 33 34  1  0      
 34 29  2  0      
 31 35  1  0      
 33 36  1  0      
 36 37  1  0      
 37 38  2  0      
 38 39  1  0      
 37 40  1  0      
 40 41  2  0      
 41 42  1  0      
 42 43  2  0      
 43 38  1  0      
 40 44  1  0      
 44 45  1  0      
 45 46  1  0      
 46 47  1  0      
 47 41  1  0      
 45 48  2  0      
 48 49  1  0      
 49 50  2  0      
 50 51  1  0      
 51 46  2  0      
 42 52  1  0      
 48 53  1  0      
 50 54  1  0      
M  END
$$$$
