# Supplementary material for: Isolation and Structural Determination of Two Novel Phlorotannins from the Brown Alga Ecklonia kurome Okamura, and Their Radical Scavenging Activities
Source: MDPI journal article supplement (doi:10.3390/md11010165), 2013-01-18
Supplement: s17 [file s17]

marinedrugs-11-00165-s008.mol
  ChemDraw06021422342D

 54 61  0  0  0  0  0  0  0  0999 V2000
    2.1434    5.3625    0.0000 C   0  0  0  0  0  0  0  0  0  0  0  0
    2.1434    4.5375    0.0000 C   0  0  0  0  0  0  0  0  0  0  0  0
    2.8579    4.1250    0.0000 C   0  0  0  0  0  0  0  0  0  0  0  0
    3.5724    4.5375    0.0000 C   0  0  0  0  0  0  0  0  0  0  0  0
    3.5724    5.3625    0.0000 C   0  0  0  0  0  0  0  0  0  0  0  0
    2.8579    5.7750    0.0000 C   0  0  0  0  0  0  0  0  0  0  0  0
    2.8579    6.6000    0.0000 O   0  0  0  0  0  0  0  0  0  0  0  0
    4.2868    4.1250    0.0000 O   0  0  0  0  0  0  0  0  0  0  0  0
    1.4289    4.1250    0.0000 O   0  0  0  0  0  0  0  0  0  0  0  0
    1.4289    3.3000    0.0000 C   0  0  0  0  0  0  0  0  0  0  0  0
    2.1434    2.8875    0.0000 C   0  0  0  0  0  0  0  0  0  0  0  0
    2.8579    3.3000    0.0000 O   0  0  0  0  0  0  0  0  0  0  0  0
    0.7145    2.8875    0.0000 C   0  0  0  0  0  0  0  0  0  0  0  0
    0.7145    2.0625    0.0000 C   0  0  0  0  0  0  0  0  0  0  0  0
    1.4289    1.6500    0.0000 C   0  0  0  0  0  0  0  0  0  0  0  0
    2.1434    2.0625    0.0000 C   0  0  0  0  0  0  0  0  0  0  0  0
    0.0000    3.3000    0.0000 O   0  0  0  0  0  0  0  0  0  0  0  0
   -0.7145    2.8875    0.0000 C   0  0  0  0  0  0  0  0  0  0  0  0
   -0.7145    2.0625    0.0000 C   0  0  0  0  0  0  0  0  0  0  0  0
    0.0000    1.6500    0.0000 O   0  0  0  0  0  0  0  0  0  0  0  0
   -1.4289    3.3000    0.0000 C   0  0  0  0  0  0  0  0  0  0  0  0
   -2.1434    2.8875    0.0000 C   0  0  0  0  0  0  0  0  0  0  0  0
   -2.1434    2.0625    0.0000 C   0  0  0  0  0  0  0  0  0  0  0  0
   -1.4289    1.6500    0.0000 C   0  0  0  0  0  0  0  0  0  0  0  0
    1.4289    0.8250    0.0000 O   0  0  0  0  0  0  0  0  0  0  0  0
   -1.4289    4.1250    0.0000 O   0  0  0  0  0  0  0  0  0  0  0  0
   -2.8579    1.6500    0.0000 O   0  0  0  0  0  0  0  0  0  0  0  0
   -2.8579    0.8250    0.0000 C   0  0  0  0  0  0  0  0  0  0  0  0
   -2.1434    0.4125    0.0000 C   0  0  0  0  0  0  0  0  0  0  0  0
   -1.4289    0.8250    0.0000 O   0  0  0  0  0  0  0  0  0  0  0  0
   -3.5724    0.4125    0.0000 C   0  0  0  0  0  0  0  0  0  0  0  0
   -3.5724   -0.4125    0.0000 C   0  0  0  0  0  0  0  0  0  0  0  0
   -2.8579   -0.8250    0.0000 C   0  0  0  0  0  0  0  0  0  0  0  0
   -2.1434   -0.4125    0.0000 C   0  0  0  0  0  0  0  0  0  0  0  0
   -4.2868    0.8250    0.0000 O   0  0  0  0  0  0  0  0  0  0  0  0
   -2.8579   -1.6500    0.0000 O   0  0  0  0  0  0  0  0  0  0  0  0
   -2.1434   -2.0625    0.0000 C   0  0  0  0  0  0  0  0  0  0  0  0
   -1.4289   -1.6500    0.0000 C   0  0  0  0  0  0  0  0  0  0  0  0
   -1.4289   -0.8250    0.0000 O   0  0  0  0  0  0  0  0  0  0  0  0
   -2.1434   -2.8875    0.0000 C   0  0  0  0  0  0  0  0  0  0  0  0
   -1.4289   -3.3000    0.0000 C   0  0  0  0  0  0  0  0  0  0  0  0
   -0.7145   -2.8875    0.0000 C   0  0  0  0  0  0  0  0  0  0  0  0
   -0.7145   -2.0625    0.0000 C   0  0  0  0  0  0  0  0  0  0  0  0
   -2.8579   -3.3000    0.0000 O   0  0  0  0  0  0  0  0  0  0  0  0
   -2.8579   -4.1250    0.0000 C   0  0  0  0  0  0  0  0  0  0  0  0
   -2.1434   -4.5375    0.0000 C   0  0  0  0  0  0  0  0  0  0  0  0
   -1.4289   -4.1250    0.0000 O   0  0  0  0  0  0  0  0  0  0  0  0
   -3.5724   -4.5375    0.0000 C   0  0  0  0  0  0  0  0  0  0  0  0
   -3.5724   -5.3625    0.0000 C   0  0  0  0  0  0  0  0  0  0  0  0
   -2.8579   -5.7750    0.0000 C   0  0  0  0  0  0  0  0  0  0  0  0
   -2.1434   -5.3625    0.0000 C   0  0  0  0  0  0  0  0  0  0  0  0
    0.0000   -3.3000    0.0000 O   0  0  0  0  0  0  0  0  0  0  0  0
   -4.2868   -4.1250    0.0000 O   0  0  0  0  0  0  0  0  0  0  0  0
   -2.8579   -6.6000    0.0000 O   0  0  0  0  0  0  0  0  0  0  0  0
  1  2  1  0      
  2  3  2  0      
  3  4  1  0      
  4  5  2  0      
  5  6  1  0      
  6  1  2  0      
  6  7  1  0      
  4  8  1  0      
  2  9  1  0      
  9 10  1  0      
 10 11  2  0      
 11 12  1  0      
 10 13  1  0      
 13 14  2  0      
 14 15  1  0      
 15 16  2  0      
 16 11  1  0      
 13 17  1  0      
 17 18  1  0      
 18 19  1  0      
 19 20  1  0      
 20 14  1  0      
 18 21  2  0      
 21 22  1  0      
 22 23  2  0      
 23 24  1  0      
 24 19  2  0      
 15 25  1  0      
 21 26  1  0      
 23 27  1  0      
 27 28  1  0      
 28 29  1  0      
 29 30  1  0      
 28 31  2  0      
 31 32  1  0      
 32 33  2  0      
 33 34  1  0      
 34 29  2  0      
 31 35  1  0      
 33 36  1  0      
 36 37  1  0      
 37 38  2  0      
 38 39  1  0      
 37 40  1  0      
 40 41  2  0      
 41 42  1  0      
 42 43  2  0      
 43 38  1  0      
 40 44  1  0      
 44 45  1  0      
 45 46  1  0      
 46 47  1  0      
 47 41  1  0      
 45 48  2  0      
 48 49  1  0      
 49 50  2  0      
 50 51  1  0      
 51 46  2  0      
 42 52  1  0      
 48 53  1  0      
 50 54  1  0      
M  END
